# Supplementary material
Source: MDPI journal article supplement (https://www.mdpi.com/2254-9625/14/2/24)
Supplement: s1 [file s1]

**Table S1** - PRISMA for network meta-analysis checklist

| Section and Topic       | #  | Checklist item                                                                                                                                                                                                                                                                                                                                                                                                                                                                                                                                                                                                                                                                                                                 | Location                                                                        |
|-------------------------|----|--------------------------------------------------------------------------------------------------------------------------------------------------------------------------------------------------------------------------------------------------------------------------------------------------------------------------------------------------------------------------------------------------------------------------------------------------------------------------------------------------------------------------------------------------------------------------------------------------------------------------------------------------------------------------------------------------------------------------------|---------------------------------------------------------------------------------|
| <b>Title</b>            |    |                                                                                                                                                                                                                                                                                                                                                                                                                                                                                                                                                                                                                                                                                                                                |                                                                                 |
| Title                   | 1  | Identify the report as a systematic review incorporating a network meta-analysis (or related form of meta-analysis).                                                                                                                                                                                                                                                                                                                                                                                                                                                                                                                                                                                                           | Title                                                                           |
| <b>Abstract</b>         |    |                                                                                                                                                                                                                                                                                                                                                                                                                                                                                                                                                                                                                                                                                                                                |                                                                                 |
| Structured summary      | 2  | Provide a structured summary including, as applicable: Background: main objectives / Methods: data sources; study eligibility criteria, participants, and interventions; study appraisal; and synthesis methods, such as network meta-analysis. / Results: number of studies and participants identified; summary estimates with corresponding confidence/credible intervals; treatment rankings may also be discussed. Authors may choose to summarize pairwise comparisons against a chosen treatment included in their analyses for brevity. / Discussion/conclusions: limitations; conclusions and implications of findings. / Other: primary source of funding; systematic review registration number with registry name. | Abstract                                                                        |
| <b>Introduction</b>     |    |                                                                                                                                                                                                                                                                                                                                                                                                                                                                                                                                                                                                                                                                                                                                |                                                                                 |
| Rationale               | 3  | Describe the rationale for the review in the context of what is already known, including mention of why a network meta-analysis has been conducted.                                                                                                                                                                                                                                                                                                                                                                                                                                                                                                                                                                            | Introduction / 1st and 2nd paragraph                                            |
| Objectives              | 4  | Provide an explicit statement of questions being addressed, with reference to participants, interventions, comparisons, outcomes, and study design (PICOS).                                                                                                                                                                                                                                                                                                                                                                                                                                                                                                                                                                    | Introduction / 3rd paragraph                                                    |
| <b>Methods</b>          |    |                                                                                                                                                                                                                                                                                                                                                                                                                                                                                                                                                                                                                                                                                                                                |                                                                                 |
| Protocol & registration | 5  | Indicate whether a review protocol exists and where it can be accessed; and, if available, provide registration information, including registration number.                                                                                                                                                                                                                                                                                                                                                                                                                                                                                                                                                                    | Materials and Methods/ 1st paragraph                                            |
| Eligibility criteria    | 6  | Specify study characteristics (e.g., PICOS, length of follow-up) and report characteristics (e.g., years considered, language, publication status) used as criteria for eligibility, giving rationale. Clearly describe eligible treatments included in the treatment network, and note whether any have been clustered or merged into the same node (with justification).                                                                                                                                                                                                                                                                                                                                                     | Materials and Methods/ Inclusion and exclusion                                  |
| Information sources     | 7  | Describe all information sources (e.g., databases with dates of coverage, contact with study authors) in the search and date last searched.                                                                                                                                                                                                                                                                                                                                                                                                                                                                                                                                                                                    | Table S2                                                                        |
| Search                  | 8  | Present full electronic search strategy for at least one database, including any limits used, such that it could be repeated.                                                                                                                                                                                                                                                                                                                                                                                                                                                                                                                                                                                                  | Table S2                                                                        |
| Study selection         | 9  | State the process for selecting studies (i.e., screening, eligibility, included in systematic review, and, if applicable, included in the meta-analysis).                                                                                                                                                                                                                                                                                                                                                                                                                                                                                                                                                                      | Materials and Methods / Study Identification / Inclusion and exclusion criteria |
| Data collection         | 10 | Describe method of data extraction from reports (e.g., piloted forms, independently, in duplicate) and any processes for obtaining and confirming data.                                                                                                                                                                                                                                                                                                                                                                                                                                                                                                                                                                        | Materials and Methods / Data extraction                                         |

|                             |    |                                                                                                                                                                                                                                                                                                                                                |                                                                |
|-----------------------------|----|------------------------------------------------------------------------------------------------------------------------------------------------------------------------------------------------------------------------------------------------------------------------------------------------------------------------------------------------|----------------------------------------------------------------|
| Data items                  | 11 | List and define all variables for which data were sought (e.g., PICOS, funding sources) and any assumptions and simplifications made.                                                                                                                                                                                                          | Materials and Methods / Data extraction and conversion         |
| Network geometry            | S1 | Describe methods used to explore the geometry of the treatment network under study and potential biases related to it. This should include how the evidence base has been graphically summarized for presentation, and what characteristics were compiled and used to describe the evidence base to readers.                                   | Materials and Methods / Modeling for network meta-analysis     |
| Risk of bias within         | 12 | Describe methods used for assessing risk of bias of individual studies (including specification of whether this was done at the study or outcome level), and how this information is to be used in any data synthesis.                                                                                                                         | Materials and Methods / Quality appraisal                      |
| Summary measures            | 13 | State the principal summary measures (e.g., risk ratio, difference in means). Also describe the use of additional summary measures assessed, such as treatment rankings, as well as modified approaches used to present summary findings from meta-analyses.                                                                                   | Materials and Methods / Outcome                                |
| Planned methods of analysis | 14 | Describe the methods of handling data and combining results of studies for each network meta-analysis. This should include, but not be limited to: Handling of multi-arm trials; Selection of variance structure; Selection of prior distributions in Bayesian analyses; and Assessment of model fit.                                          | Materials and Methods / Statistical analyses                   |
| Assessment of inconsistency | S2 | Describe the statistical methods used to evaluate the agreement of direct and indirect evidence in the treatment network(s) studied. Describe efforts taken to address its presence when found.                                                                                                                                                | Materials and Methods / Statistical analyses                   |
| Risk of bias across         | 15 | Specify any assessment of risk of bias that may affect the cumulative evidence.                                                                                                                                                                                                                                                                | Materials and Methods / Publication bias                       |
| Additional analyses         | 16 | Describe methods of additional analyses if done, indicating which were pre-specified. This may include, but not be limited to, the following: Sensitivity or subgroup analyses; Meta-regression analyses; Alternative formulations of the treatment network; and Use of alternative prior distributions for Bayesian analyses (if applicable). | Materials and Methods / Sensitivity analyses                   |
| <b>Results</b>              |    |                                                                                                                                                                                                                                                                                                                                                |                                                                |
| Study selection             | 17 | Give numbers of studies screened, assessed for eligibility, and included in the review, with reasons for exclusions at each stage, ideally with a flow diagram.                                                                                                                                                                                | Results / Study identification<br>Figure 1, Table S2, Table S3 |
| Network structure           | S3 | Provide a network graph of the included studies to enable visualization of the geometry of the treatment network.                                                                                                                                                                                                                              | Figure 2                                                       |
| Network geometry            | S4 | Provide a brief overview of characteristics of the treatment network. This may include commentary on the abundance of trials and randomized patients for the different interventions and pairwise comparisons in the network, gaps of evidence in the treatment network, and potential biases reflected by the network structure.              | Results / Network model formation / Figure 2                   |
| Study characteristics       | 18 | For each study, present characteristics for which data were extracted (e.g., study size, PICOS, follow-up period) and provide the citations.                                                                                                                                                                                                   | Table 1                                                        |
| Risk of bias within         | 19 | Present data on risk of bias of each study and, if available, any outcome level assessment.                                                                                                                                                                                                                                                    | Table S4, Figure S1,<br>Methodological quality                 |

|                               |    |                                                                                                                                                                                                                                                                                                                                                                                                                                                       |                                                              |
|-------------------------------|----|-------------------------------------------------------------------------------------------------------------------------------------------------------------------------------------------------------------------------------------------------------------------------------------------------------------------------------------------------------------------------------------------------------------------------------------------------------|--------------------------------------------------------------|
| Results of individual studies | 20 | For all outcomes considered (benefits or harms), present, for each study: (1) simple summary data for each intervention group, and (2) effect estimates and confidence intervals. Modified approaches may be needed to deal with information from larger networks.                                                                                                                                                                                    | Table 1                                                      |
| Synthesis of results          | 21 | Present results of each meta-analysis done, including confidence/credible intervals. In larger networks, authors may focus on comparisons versus a particular comparator (e.g. placebo or standard care), with full findings presented in an appendix. League tables and forest plots may be considered to summarize pairwise comparisons. If additional summary measures were explored (such as treatment rankings), these should also be presented. | Outcomes / Figure 3, Figure 4, Figure S2, Figure S3, Table 2 |
| Exploration for inconsistency | S5 | Describe results from investigations of inconsistency. This may include such information as measures of model fit to compare consistency and inconsistency models, P values from statistical tests, or summary of inconsistency estimates from different parts of the treatment network.                                                                                                                                                              | Inconsistency test<br>Table S5, Table S6                     |
| Risk of bias across           | 22 | Present results of any assessment of risk of bias across studies for the evidence base being studied.                                                                                                                                                                                                                                                                                                                                                 | Publication bias, Figure S6                                  |
| Additional analyses           | 23 | Give results of additional analyses, if done (e.g., sensitivity or subgroup analyses, meta-regression analyses, alternative network geometries studied, alternative choice of prior distributions for Bayesian analyses, and so forth).                                                                                                                                                                                                               | Sensitivity analysis / Figure S4, Figure S5                  |
| <b>Discussion</b>             |    |                                                                                                                                                                                                                                                                                                                                                                                                                                                       |                                                              |
| Summary of evidence           | 24 | Summarize the main findings, including the strength of evidence for each main outcome; consider their relevance to key groups.                                                                                                                                                                                                                                                                                                                        | Discussion<br>Findings and implications                      |
| Limitations                   | 25 | Discuss limitations at study and outcome level (e.g., risk of bias), and at review level (e.g., incomplete retrieval of identified research, reporting bias). Comment on the validity of the assumptions, such as transitivity and consistency. Comment on any concerns regarding network geometry (e.g., avoidance of certain comparisons).                                                                                                          | Discussion<br>Limitations                                    |
| Conclusions                   | 26 | Provide a general interpretation of the results in the context of other evidence, and implications for future research.                                                                                                                                                                                                                                                                                                                               | Conclusion                                                   |
| <b>Funding</b>                |    |                                                                                                                                                                                                                                                                                                                                                                                                                                                       |                                                              |
| Funding                       | 27 | Describe sources of funding for the systematic review and other support (e.g., supply of data); role of funders for the systematic review. This should also include information regarding whether funding has been received from manufacturers of treatments in the network and/or whether some of the authors are content experts with professional conflicts of interest that could affect use of treatments in the network.                        | Funding                                                      |

**Table S2** - Keywords and search results in different databases**1570**

| Database         | Keyword                           | Date       | Results |
|------------------|-----------------------------------|------------|---------|
| PubMed           | music AND depression AND dementia | 2023.10.11 | 206     |
| Embase           | music AND depression AND dementia | 2023.10.11 | 460     |
| Cochrane CENTRAL | music AND depression AND dementia | 2023.10.11 | 138     |
| Web of Science   | music AND depression AND dementia | 2023.10.11 | 279     |
|                  |                                   |            | 1083    |

| Database         | Keyword                            | Date       | Results |
|------------------|------------------------------------|------------|---------|
| PubMed           | music AND depression AND alzheimer | 2023.10.11 | 91      |
| Embase           | music AND depression AND alzheimer | 2023.10.11 | 224     |
| Cochrane CENTRAL | music AND depression AND alzheimer | 2023.10.11 | 80      |
| Web of Science   | music AND depression AND alzheimer | 2023.10.11 | 92      |
|                  |                                    |            | 487     |

| Database         | Keyword                                                                          | Date       | Results |
|------------------|----------------------------------------------------------------------------------|------------|---------|
| PubMed           | music AND depression AND dementia AND ('random' OR 'randomized' OR 'randomised') | 2023.10.11 | 73      |
| Embase           | music AND depression AND dementia AND ('random' OR 'randomized' OR 'randomised') | 2023.10.11 | 162     |
| Cochrane CENTRAL | music AND depression AND dementia AND ('random' OR 'randomized' OR 'randomised') | 2023.10.11 | 129     |
| Web of Science   | music AND depression AND dementia AND ('random' OR 'randomized' OR 'randomised') | 2023.10.11 | 114     |
|                  |                                                                                  |            | 478     |

| Database         | Keyword                                                                           | Date       | Results |
|------------------|-----------------------------------------------------------------------------------|------------|---------|
| PubMed           | music AND depression AND alzheimer AND ('random' OR 'randomized' OR 'randomised') | 2023.10.11 | 35      |
| Embase           | music AND depression AND alzheimer AND ('random' OR 'randomized' OR 'randomised') | 2023.10.11 | 74      |
| Cochrane CENTRAL | music AND depression AND alzheimer AND ('random' OR 'randomized' OR 'randomised') | 2023.10.11 | 71      |
| Web of Science   | music AND depression AND alzheimer AND ('random' OR 'randomized' OR 'randomised') | 2023.10.11 | 34      |
|                  |                                                                                   |            | 214     |

## Table S3 Excluded studies and reasons

| No. | First Author / Publication Year | Title                                                                                                                                                                                                        | Journal/Book                                          | Exclusion reasons      |
|-----|---------------------------------|--------------------------------------------------------------------------------------------------------------------------------------------------------------------------------------------------------------|-------------------------------------------------------|------------------------|
| 1   | Bakerjian et al., 2020          | The Impact of Music and Memory on Resident Level Outcomes in California Nursing Homes                                                                                                                        | Journal of the American Medical Directors Association | Not RCT                |
| 2   | Buard et al., 2021              | Randomized controlled trial of neurologic music therapy in Parkinson's disease: research rehabilitation protocols for mechanistic and clinical investigations                                                | Trials                                                | Protocol               |
| 3   | Clark et al., 2020              | "It's Feasible to Write a Song": A Feasibility Study Examining Group Therapeutic Songwriting for People Living With Dementia and Their Family Caregivers                                                     | Frontiers in Psychology                               | Incomplete data        |
| 4   | Davison et al., 2016            | A personalized multimedia device to treat agitated behavior and improve mood in people with dementia: A pilot study                                                                                          | Geriatr Nurs                                          | Pilot study            |
| 5   | Gaviola et al., 2020            | Impact of individualised music listening intervention on persons with dementia: A systematic review of randomised controlled trials                                                                          | Australasian journal on ageing                        | Review & meta analysis |
| 6   | Jung et al., 2023               | Effect of internet-based vs. in-person multimodal interventions on patients with mild to moderate Alzheimer's disease: a randomized, cross-over, open-label trial                                            | Frontiers in Public Health                            | No music intervention  |
| 7   | Kwak et al., 2020               | Findings From a Prospective Randomized Controlled Trial of an Individualized Music Listening Program for Persons With Dementia                                                                               | Journal of Applied Gerontology                        | Incomplete data        |
| 8   | Lai et al., 2016                | Interdisciplinary collaboration in the use of a music-with-movement intervention to promote the wellbeing of people with dementia and their families: Development of an evidence-based intervention protocol | Nursing & Health Sciences                             | Protocol               |
| 9   | Loi et al., 2022                | Music and Psychology & Social Connections Program: Protocol for a Novel Intervention for Dyads Affected by Younger-Onset Dementia                                                                            | Brain Sciences                                        | Protocol               |
| 10  | Mahendran et al., 2017          | Art therapy and music reminiscence activity in the prevention of cognitive decline: Study protocol for a randomized controlled trial                                                                         | Trials                                                | Protocol               |
| 11  | McCreedy et al., 2022           | Pragmatic Trial of Personalized Music for Agitation and Antipsychotic Use in Nursing Home Residents With Dementia                                                                                            | Journal of the American Medical Directors Association | Incomplete data        |
| 12  | Na et al., 2019                 | A systematic review and meta-analysis of nonpharmacological interventions for moderate to severe dementia                                                                                                    | Psychiatry Investigation                              | Review & meta analysis |
| 13  | Noone et al., 2019              | Meta-analysis of psychosocial interventions for people with dementia and anxiety or depression                                                                                                               | Aging & mental health                                 | Review & meta analysis |
| 14  | Raglio et al., 2008             | Efficacy of music therapy in the treatment of behavioral and psychiatric symptoms of dementia                                                                                                                | Alzheimer Disease & Associated Disorders              | Incomplete data        |
| 15  | Raglio et al., 2015             | Effects of music and music therapy on mood in neurological patients                                                                                                                                          | World Journal of Psychiatry                           | Review & meta analysis |
| 16  | Sánchez et al., 2016            | Comparing the Effects of Multisensory Stimulation and Individualized Music Sessions on Elderly People with Severe Dementia: A Randomized Controlled Trial                                                    | Journal of Alzheimer's Disease                        | Incomplete data        |
| 17  | Särkämö et al., 2014            | Music perception and cognition: development, neural basis, and rehabilitative use of music                                                                                                                   | Wiley Interdisciplinary Reviews: Cognitive Science    | Incomplete data        |

| No. | First Author / Publication Year | Title                                                                                                                                                        | Journal/Book                                                  | Exclusion reasons      |
|-----|---------------------------------|--------------------------------------------------------------------------------------------------------------------------------------------------------------|---------------------------------------------------------------|------------------------|
| 18  | Scott S. et al., 2016           | A scoping review of music and anxiety, depression and agitation in older people with dementia in residential facilities and specialist care units            | European Geriatric Medicine                                   | Review & meta analysis |
| 19  | Svansdottir et al., 2006        | Music therapy in moderate and severe dementia of Alzheimer's type: a case-control study                                                                      | Int Psychogeriatr                                             | No depression data     |
| 20  | Tan et al., 2018                | Study protocol for a randomized controlled trial of choral singing intervention to prevent cognitive decline in at-risk older adults living in the community | Frontiers in Aging Neuroscience                               | Protocol               |
| 21  | Tang et al., 2013               | The effectiveness of nursing management on improving health outcomes for hospitalized older adults with delirium: A systematic review protocol               | JBI Database of Systematic Reviews and Implementation Reports | Protocol               |
| 22  | Thornley et al., 2016           | Music therapy in patients with dementia and behavioral disturbance on an inpatient psychiatry unit: results from a pilot randomized controlled study         | International Psychogeriatrics                                | Pilot study            |
| 23  | Valdiglesias et al., 2017       | Is Salivary Chromogranin A a Valid Psychological Stress Biomarker During Sensory Stimulation in People with Advanced Dementia?                               | Journal of Alzheimer's Disease                                | No depression data     |
| 24  | Zhang et al., 2023              | Does music intervention relieve depression or anxiety in people living with dementia? A systematic review and meta-analysis                                  | Aging & Mental Health                                         | Review & meta analysis |

**Table S4** - Detailed quality assessment of included studies using Cochrane risk of bias 2 tool

| First author & Year        | Randomization process | Intervention adherence | Missing outcome data | Outcome measurement | Selective reporting | Overall RoB |
|----------------------------|-----------------------|------------------------|----------------------|---------------------|---------------------|-------------|
| Baker et al., 2022         | L                     | S <sup>2</sup>         | S                    | L                   | L                   | S           |
| Biasutti et al., 2021      | L                     | S <sup>2</sup>         | S                    | L                   | S                   | S           |
| Ceccato et al., 2012       | L                     | S <sup>3</sup>         | L                    | L                   | S                   | S           |
| Cheung et al., 2018        | L                     | L <sup>2</sup>         | L                    | L                   | S                   | L           |
| Cheung et al., 2022        | S                     | L <sup>2</sup>         | S                    | L                   | S                   | S           |
| Chu et al., 2014           | L                     | L <sup>2</sup>         | S                    | L                   | L                   | S           |
| Delphin-Combe et al., 2013 | L                     | S <sup>2</sup>         | S                    | L                   | S                   | S           |
| Giovagnoli et al., 2017    | L                     | S <sup>2</sup>         | S                    | L                   | L                   | L           |
| Giovagnoli et al., 2018    | L                     | S <sup>2</sup>         | S                    | L                   | S                   | S           |
| Guétin et al., 2009        | L                     | S <sup>2</sup>         | S                    | L                   | L                   | L           |
| Liu et al., 2021           | L                     | S <sup>2</sup>         | L                    | L                   | L                   | L           |
| Pérez-Ros et al., 2019     | L                     | S <sup>2</sup>         | L                    | L                   | L                   | S           |
| Pongan et al., 2017        | S                     | S <sup>2</sup>         | S                    | L                   | S                   | S           |
| Raglio et al., 2015        | L                     | S <sup>2</sup>         | S                    | L                   | L                   | S           |

1 The study employed a waitlist control group design, which resulted in a more balanced comparison among different groups.

2 The differences in protocols among various groups may affect adherence and outcome.

3 Both groups were randomized to receive exercise interventions, and the study design utilized a balanced protocol, which minimized the impact on adherence.

H, high risk of bias; L, low risk of bias; S, some risk of bias.

**Table S5.** Results of inconsistency tests for the standardized mean difference in depression improvement among dementia patients receiving music therapy

| Comparison       | Studies | NMA   | Direct | Indirect | Difference | 95CI-L | 95CI-U | p-value |
|------------------|---------|-------|--------|----------|------------|--------|--------|---------|
| AMT:AMT+Sing     | 1       | 0.50  | 0.39   | 0.62     | -0.23      | -1.54  | 1.08   | 0.73    |
| AMT:Control      | 6       | -0.39 | -0.41  | -0.11    | -0.31      | -1.73  | 1.11   | 0.67    |
| AMT:LtM          | 1       | -0.13 | -0.25  | -0.07    | -0.17      | -1.35  | 1.01   | 0.78    |
| AMT:RMT          | 0       | 0.05  | -      | 0.05     | -          | -      | -      | -       |
| AMT:Sing         | 1       | 0.00  | 0.41   | -0.47    | 0.89       | -0.44  | 2.21   | 0.19    |
| AMT:TMI          | 0       | 0.00  | -      | 0.00     | -          | -      | -      | -       |
| AMT+Sing:Control | 2       | -0.89 | -1.07  | 0.17     | -1.24      | -2.92  | 0.44   | 0.15    |
| AMT+Sing:LtM     | 0       | -0.63 | -      | -0.63    | -          | -      | -      | -       |
| AMT+Sing:RMT     | 0       | -0.45 | -      | -0.45    | -          | -      | -      | -       |
| AMT+Sing:Sing    | 1       | -0.50 | 0.02   | -1.66    | 1.68       | 0.08   | 3.28   | 0.04    |
| AMT+Sing:TMI     | 0       | -0.50 | -      | -0.50    | -          | -      | -      | -       |
| LtM:Control      | 4       | -0.26 | -0.23  | -0.43    | 0.19       | -1.29  | 1.67   | 0.80    |
| RMT:Control      | 3       | -0.44 | -0.44  | -0.49    | 0.05       | -1.93  | 2.03   | 0.96    |
| Sing:Control     | 2       | -0.39 | -0.29  | -0.94    | 0.65       | -1.01  | 2.31   | 0.44    |
| TMI:Control      | 1       | -0.39 | -0.39  | -        | -          | -      | -      | -       |
| LtM:RMT          | 1       | 0.19  | 0.14   | 0.23     | -0.10      | -1.35  | 1.16   | 0.88    |
| LtM:Sing         | 0       | 0.14  | -      | 0.14     | -          | -      | -      | -       |
| LtM:TMI          | 0       | 0.13  | -      | 0.13     | -          | -      | -      | -       |
| RMT:Sing         | 0       | -0.05 | -      | -0.05    | -          | -      | -      | -       |
| RMT:TMI          | 0       | -0.05 | -      | -0.05    | -          | -      | -      | -       |
| Sing:TMI         | 0       | 0.00  | -      | 0.00     | -          | -      | -      | -       |

95CI-L: lower limit of 95% confidence interval; 95CI-U: upper limit of 95% confidence interval; NMA: network meta-analysis.



**Table S6.** Inconsistency test results for the risk difference in dropout rates when applying music therapy to alleviate depression in dementia patients.

| Comparison       | Studies | NMA   | Direct | Indirect | Difference | 95CI-L | 95CI-U | p-value |
|------------------|---------|-------|--------|----------|------------|--------|--------|---------|
| AMT:AMT+Sing     | 1       | 0.01  | 0.14   | -0.03    | 0.17       | 0.00   | 0.34   | 0.05    |
| AMT:Control      | 6       | 0.02  | 0.01   | 0.07     | -0.07      | -0.19  | 0.06   | 0.30    |
| AMT:LtM          | 1       | 0.01  | 0.00   | 0.03     | -0.03      | -0.11  | 0.05   | 0.50    |
| AMT:RMT          | 0       | 0.02  | -      | 0.02     | -          | -      | -      | -       |
| AMT:Sing         | 1       | 0.04  | 0.17   | 0.01     | 0.16       | 0.00   | 0.33   | 0.05    |
| AMT:TMI          | 0       | 0.02  | -      | 0.02     | -          | -      | -      | -       |
| AMT+Sing:Control | 2       | 0.01  | 0.01   | 0.00     | 0.01       | -0.20  | 0.22   | 0.91    |
| AMT+Sing:LtM     | 0       | 0.01  | -      | 0.01     | -          | -      | -      | -       |
| AMT+Sing:RMT     | 0       | 0.01  | -      | 0.01     | -          | -      | -      | -       |
| AMT+Sing:Sing    | 1       | 0.03  | 0.03   | 0.03     | 0.00       | -0.17  | 0.17   | 1.00    |
| AMT+Sing:TMI     | 0       | 0.01  | -      | 0.01     | -          | -      | -      | -       |
| LtM:Control      | 4       | 0.00  | 0.00   | 0.07     | -0.07      | -0.21  | 0.07   | 0.32    |
| RMT:Control      | 3       | 0.00  | 0.00   | -0.03    | 0.03       | -0.24  | 0.29   | 0.83    |
| Sing:Control     | 2       | -0.02 | -0.02  | -0.05    | 0.03       | -0.17  | 0.23   | 0.79    |
| TMI:Control      | 1       | 0.00  | 0.00   | -        | -          | -      | -      | -       |
| LtM:RMT          | 1       | 0.00  | 0.04   | 0.00     | 0.03       | -0.13  | 0.20   | 0.68    |
| LtM:Sing         | 0       | 0.03  | -      | 0.03     | -          | -      | -      | -       |
| LtM:TMI          | 0       | 0.00  | -      | 0.00     | -          | -      | -      | -       |
| RMT:Sing         | 0       | 0.02  | -      | 0.02     | -          | -      | -      | -       |
| RMT:TMI          | 0       | 0.00  | -      | 0.00     | -          | -      | -      | -       |
| Sing:TMI         | 0       | -0.02 | -      | -0.02    | -          | -      | -      | -       |

95CI-L: lower limit of 95% confidence interval; 95CI-U: upper limit of 95% confidence interval; NMA: network meta-analysis.

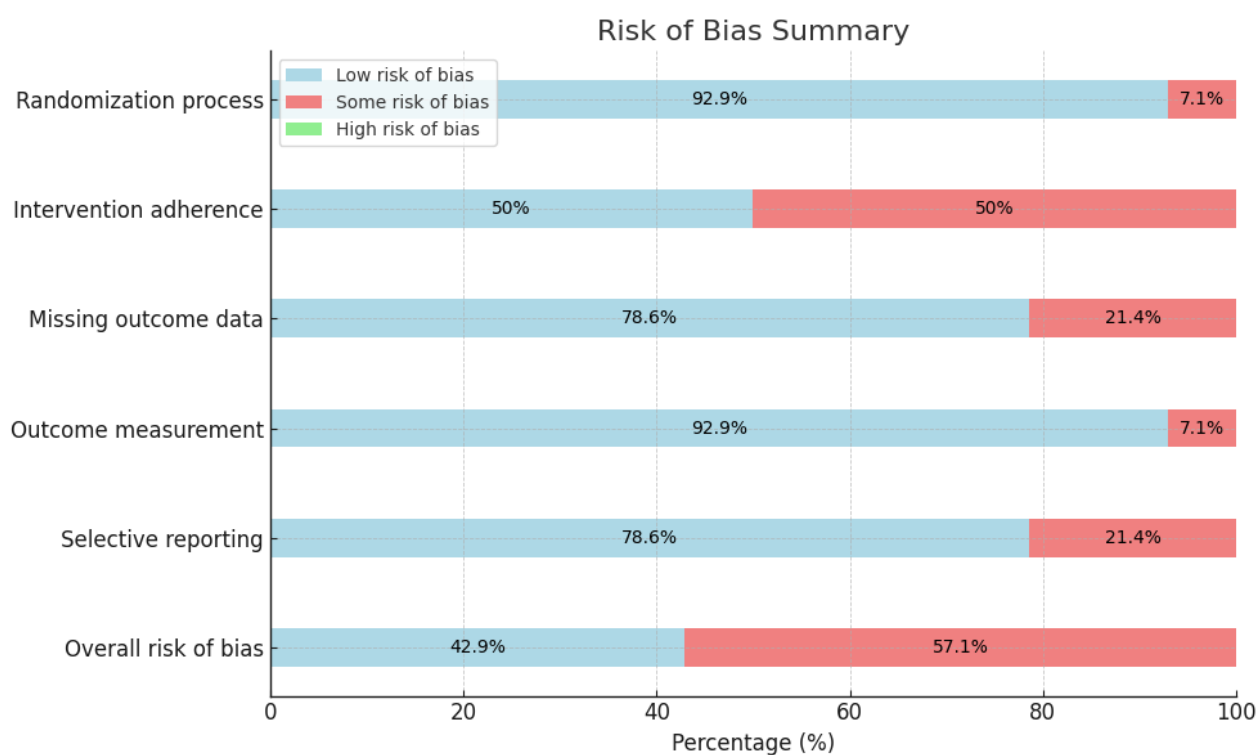

**Figure S1.** Summary of quality assessment of studies included in the network meta-analysis using Cochrane risk of bias 2 tool

**Fig S2. Individual study results (for all studies) grouped by treatment comparison**

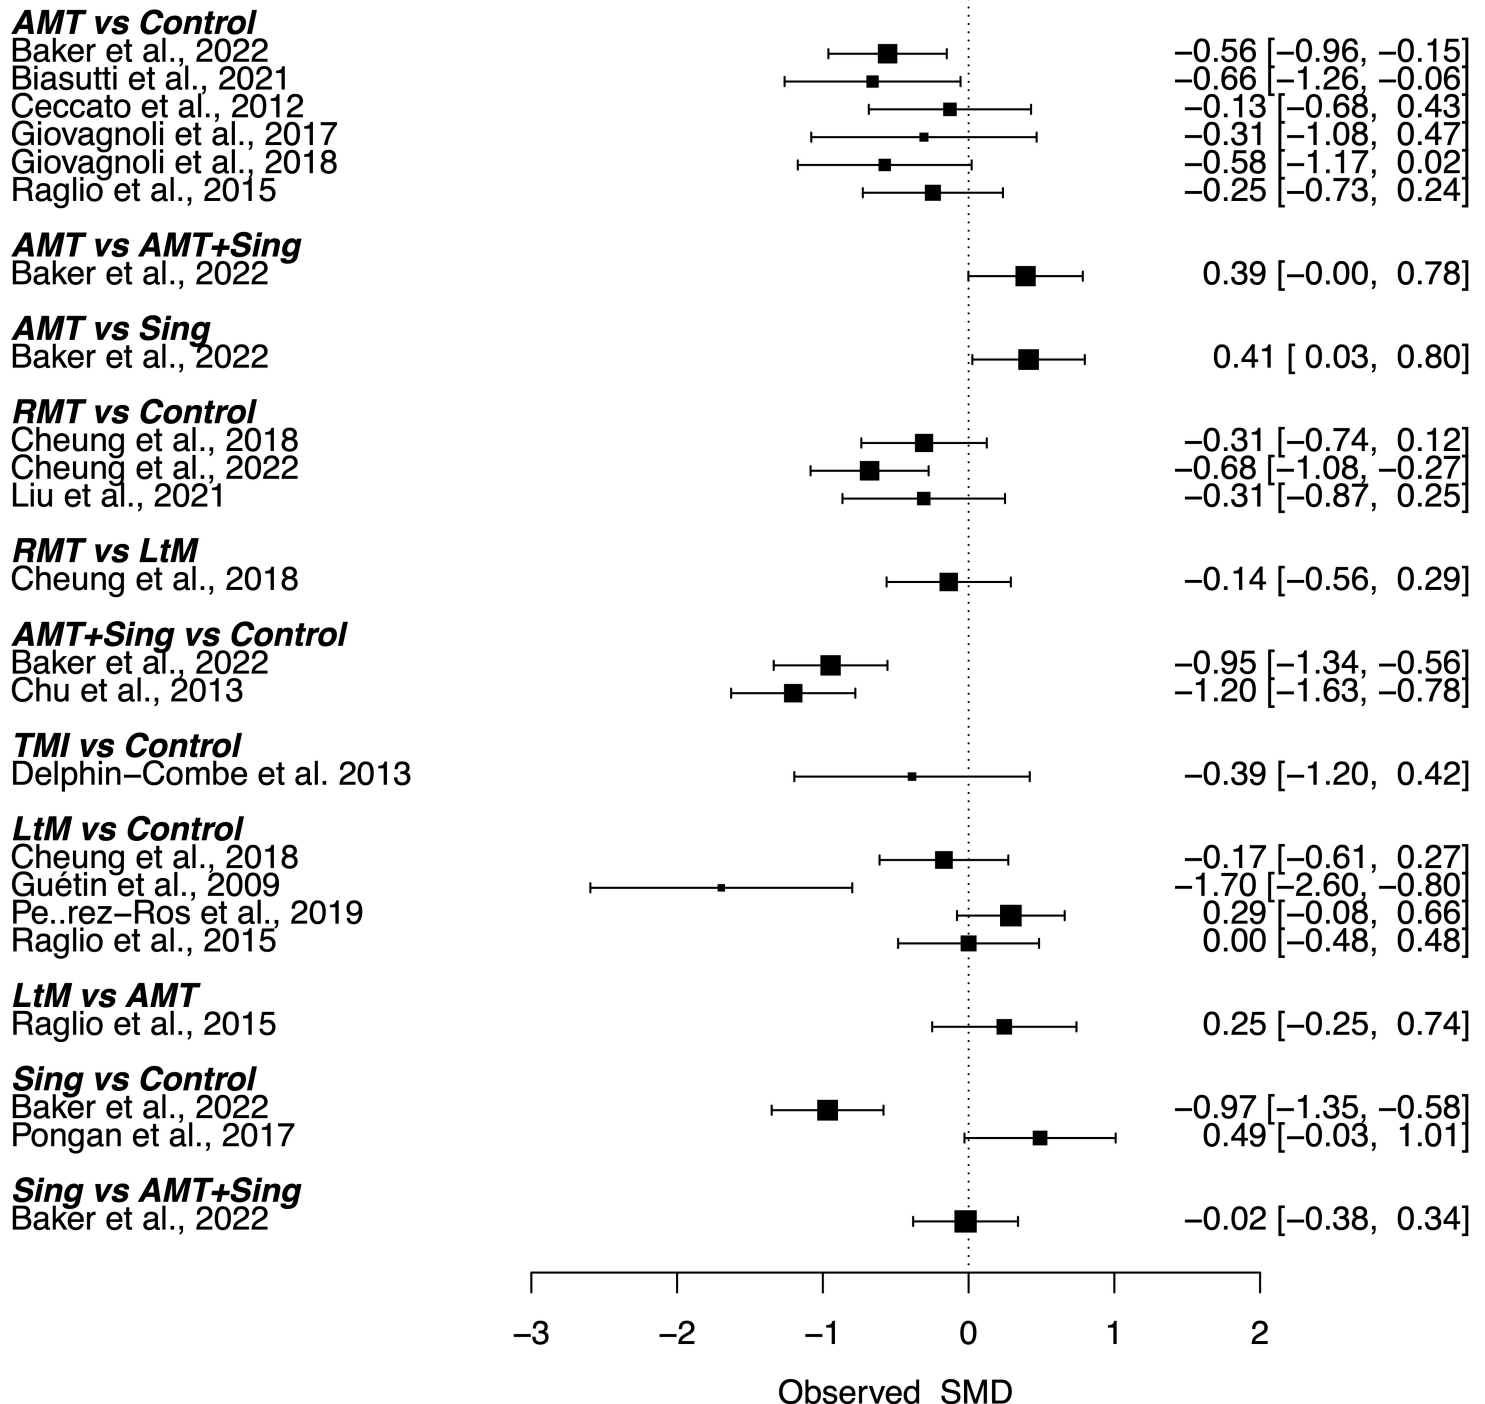

**Fig S2.** The forest plot of pairwise comparisons for different music interventions aimed at alleviating depression in individuals with dementia, as derived from the included trials, showcases the standardized mean difference (SMD) in improvement of depression symptoms.

**Fig S3. Individual study results (for all studies) grouped by treatment comparison**

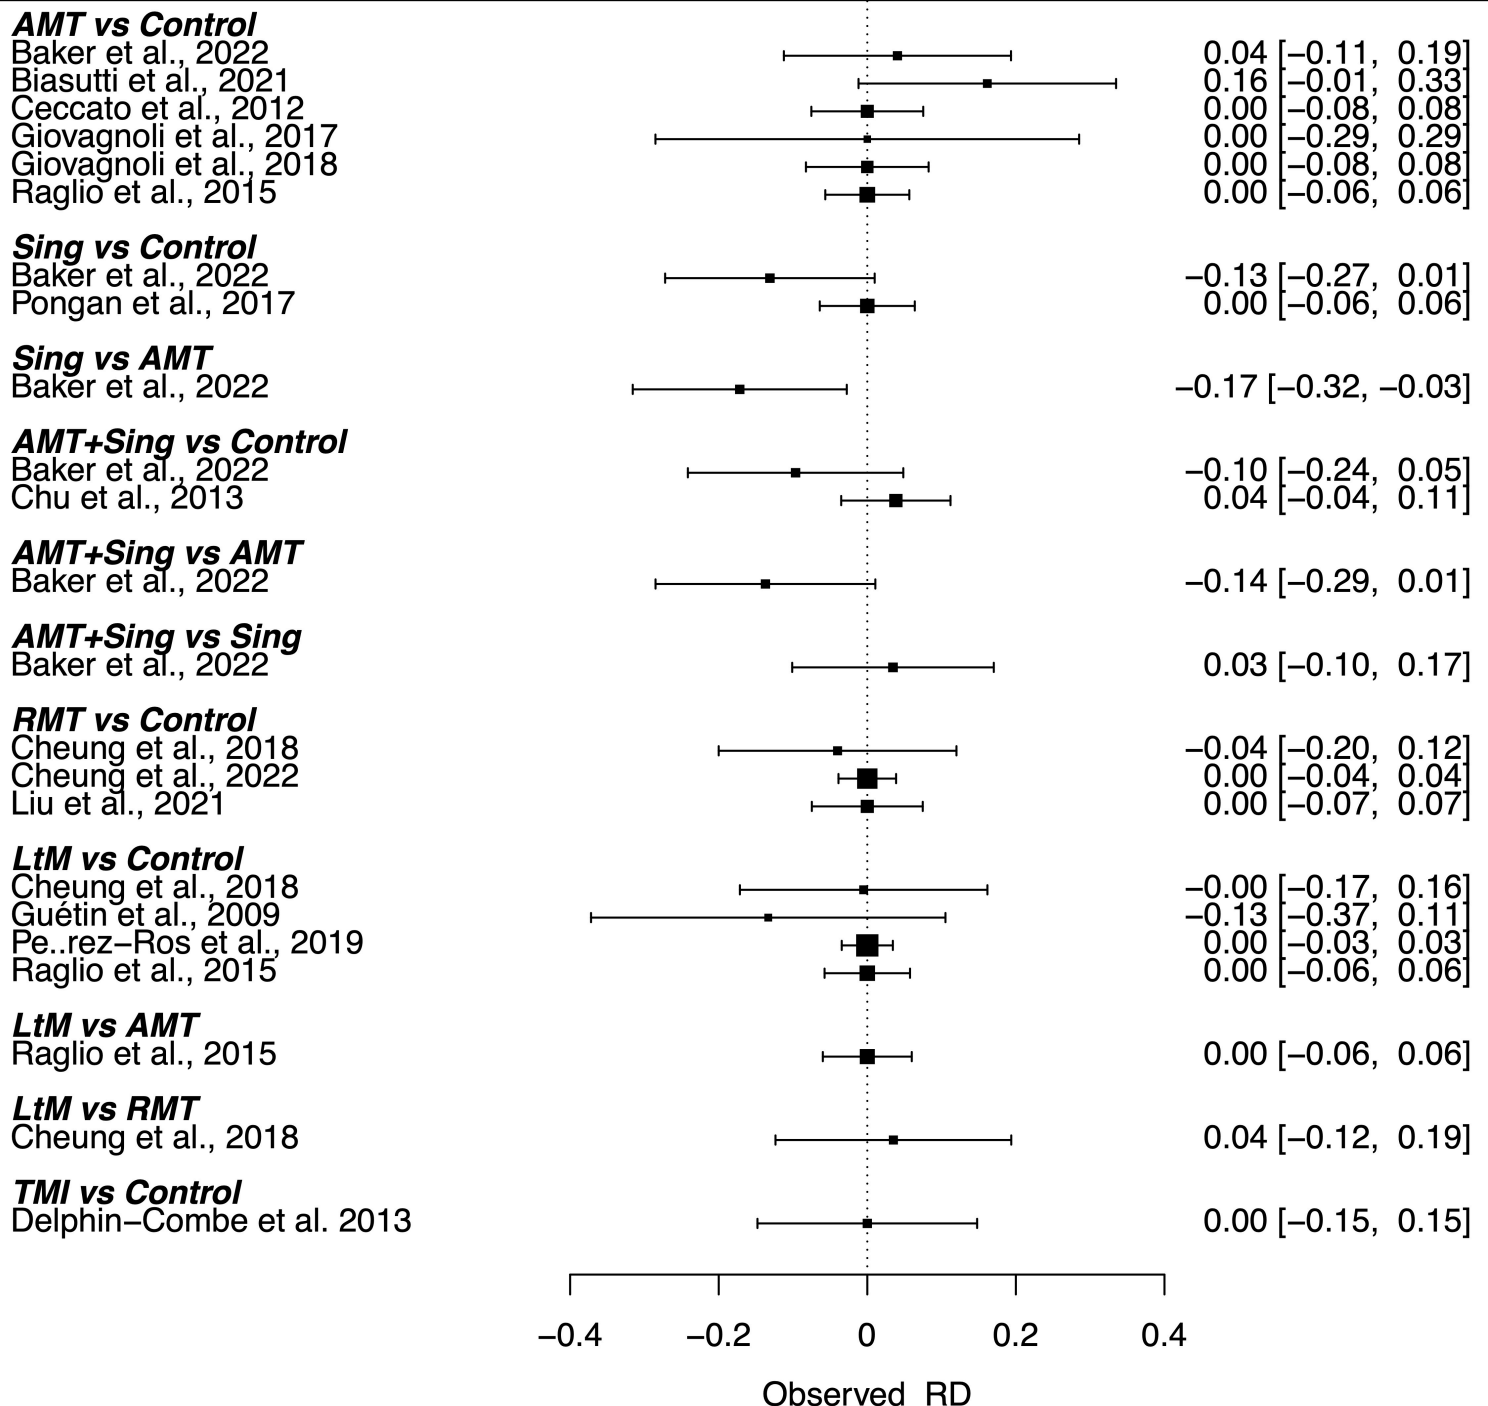

**Fig S3.** The forest plot of pairwise comparisons for different music interventions in patients with dementia and depression, retrieved from the included trials, demonstrates the risk difference (RD) of dropout rates from the experiments. None of the comparisons reached statistical significance.

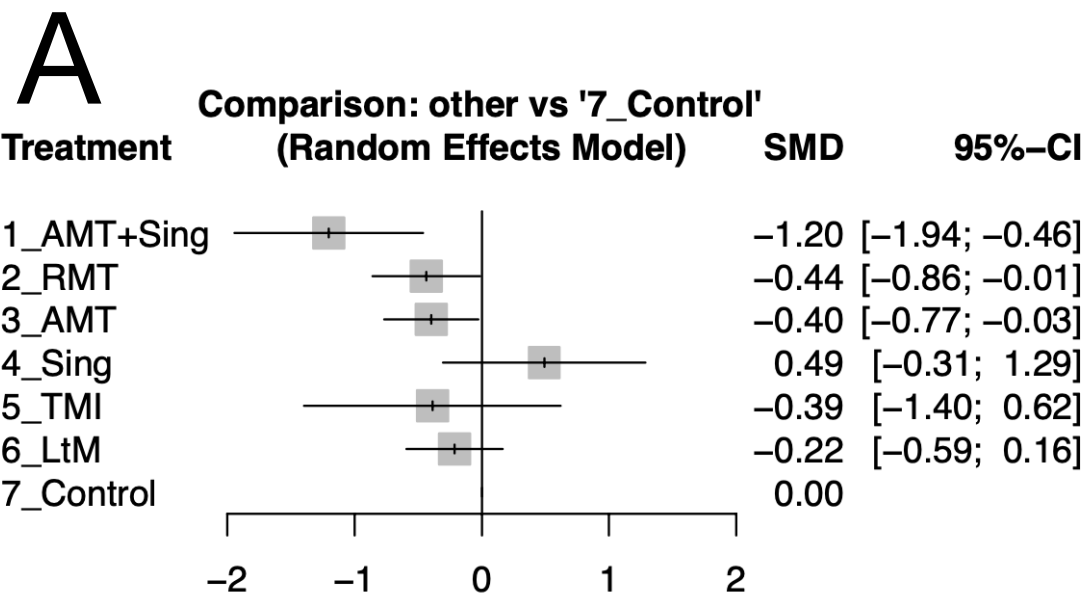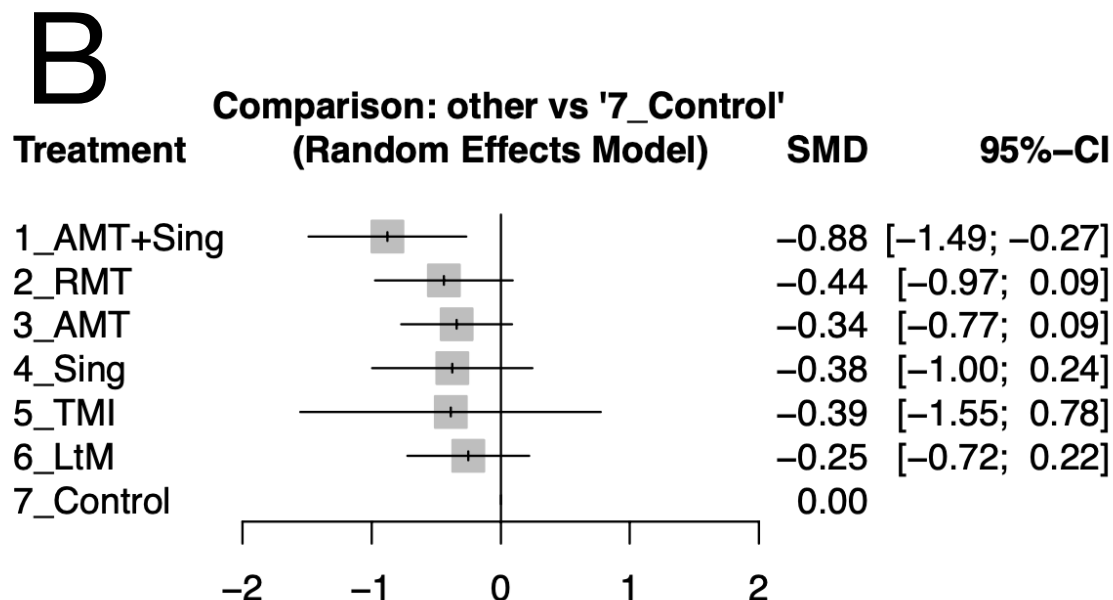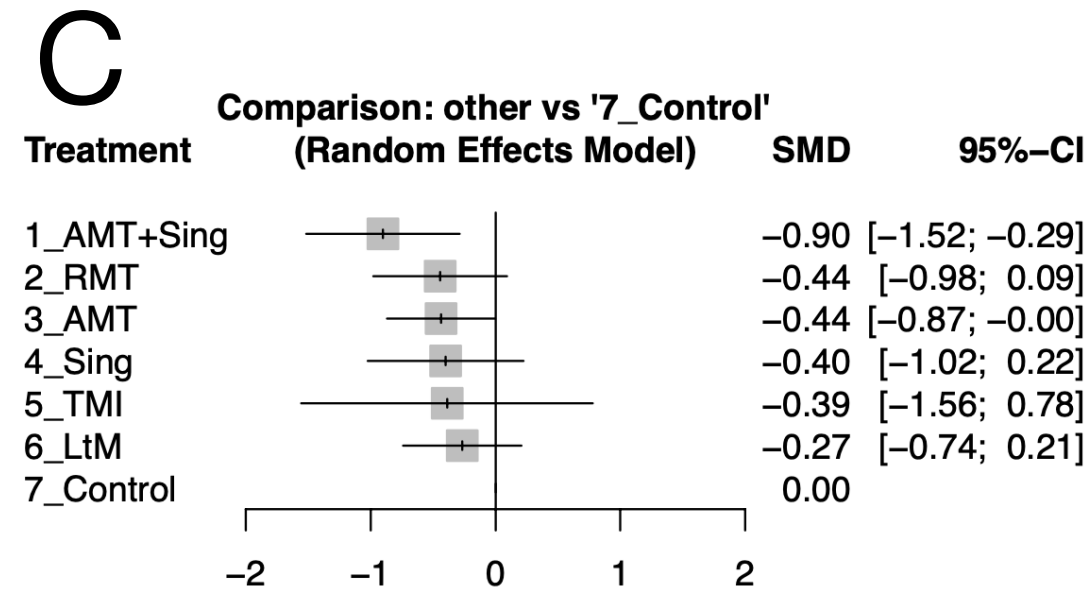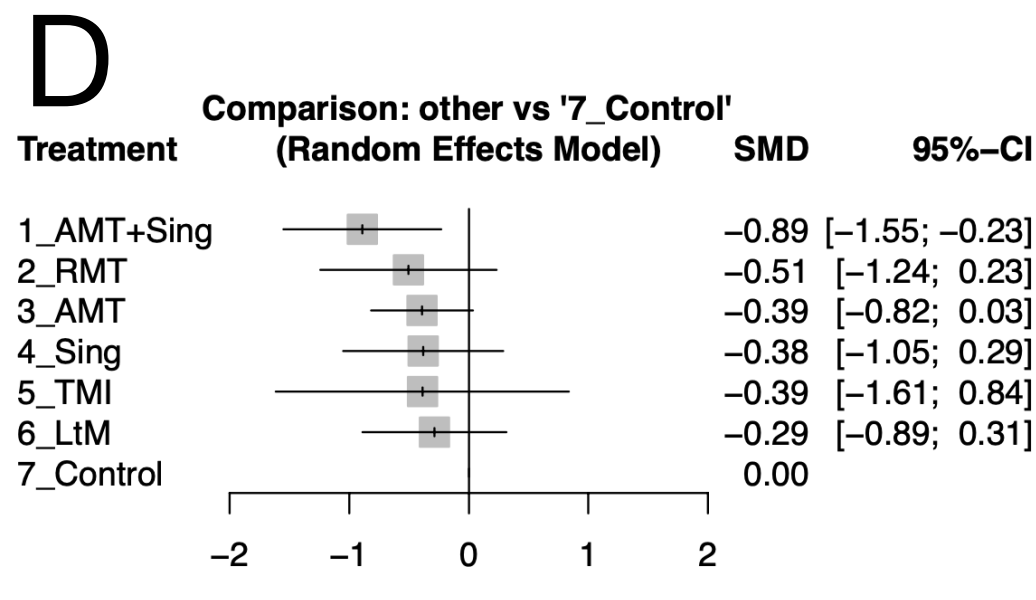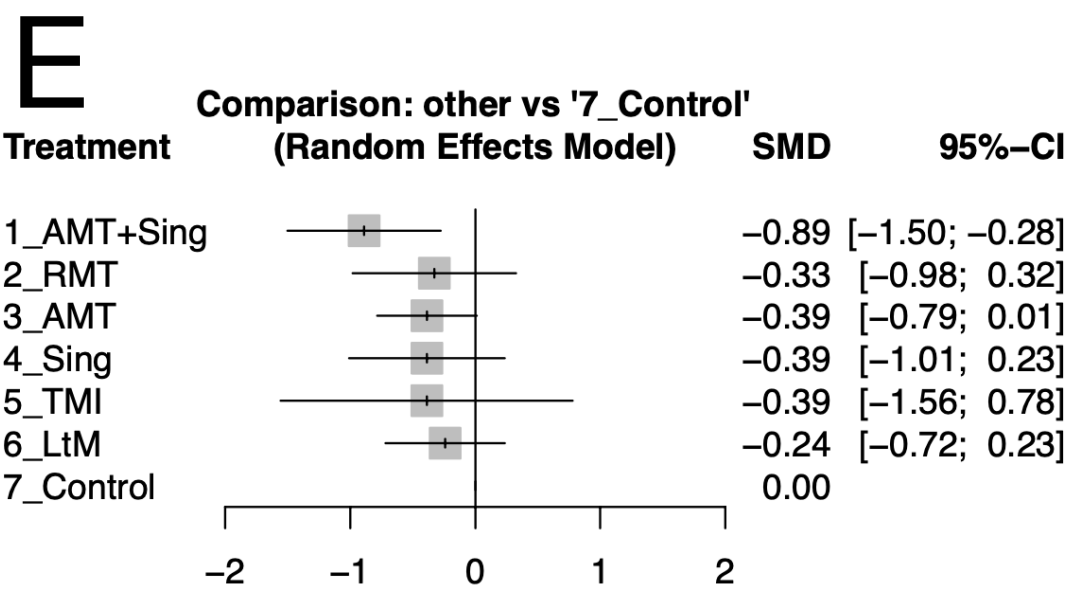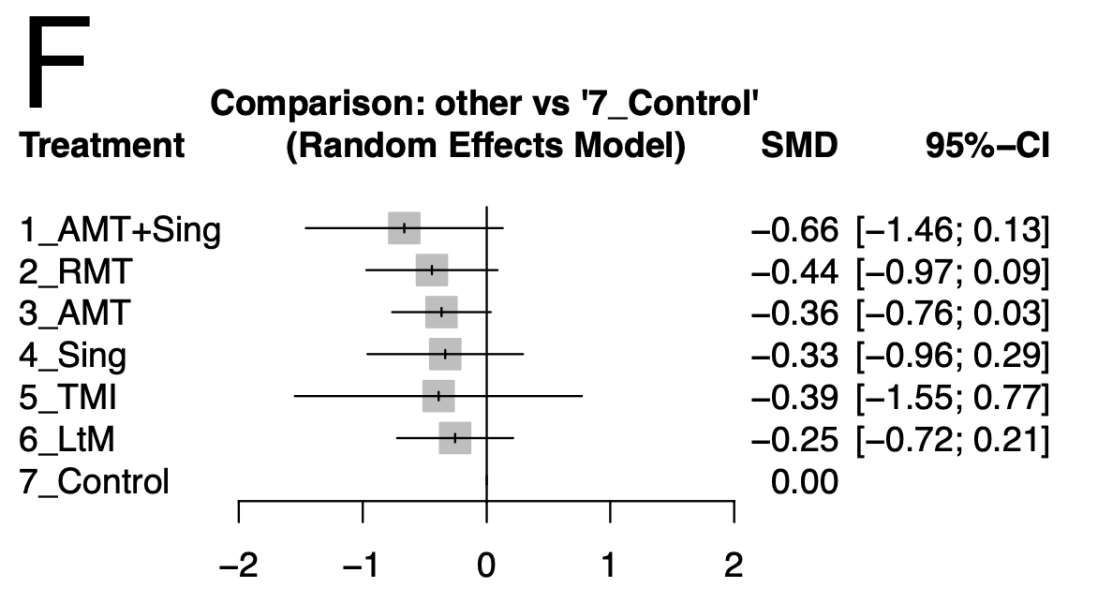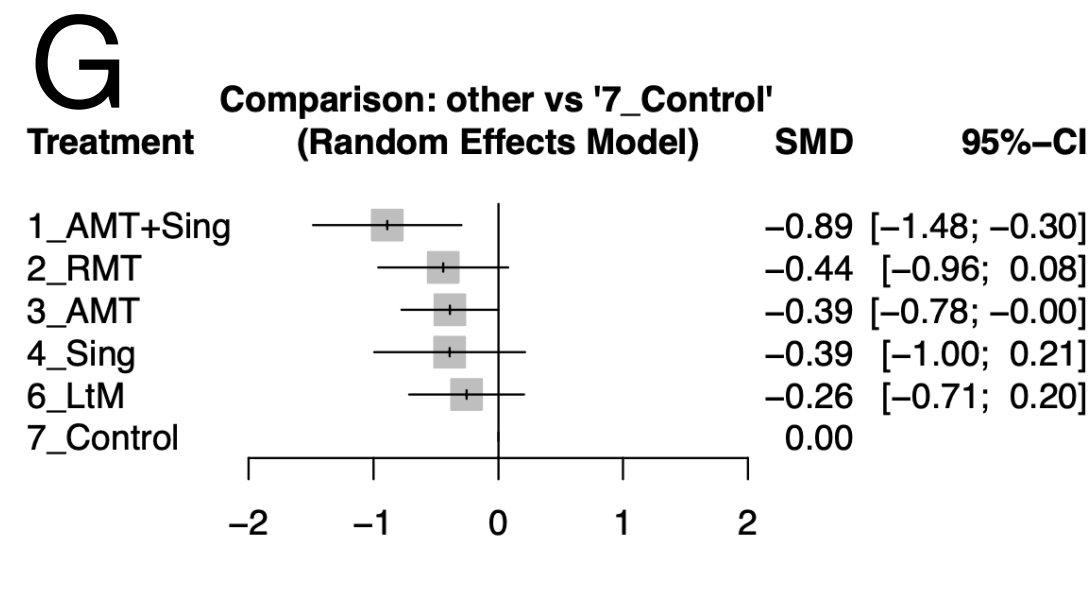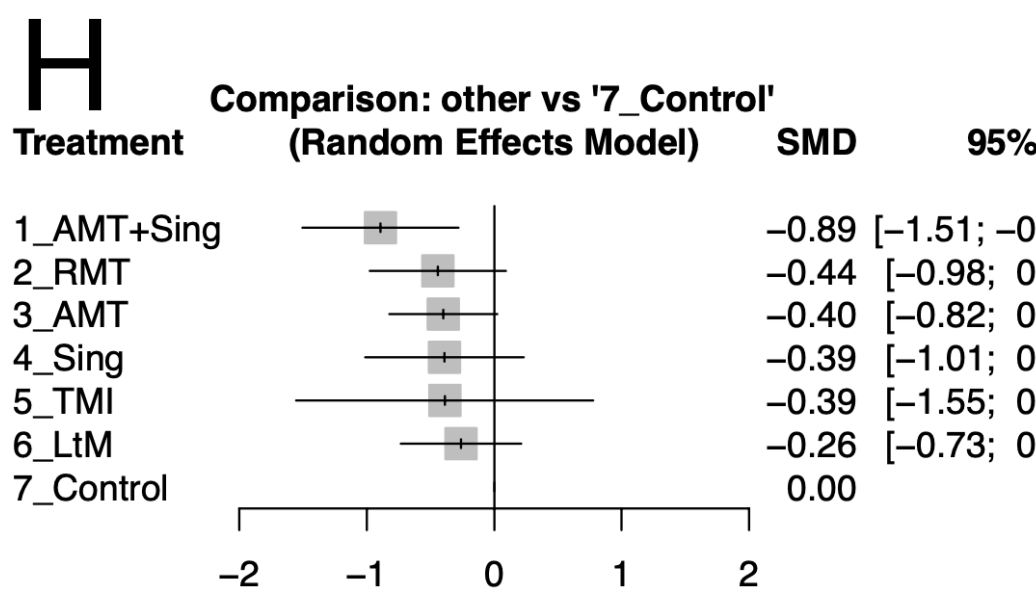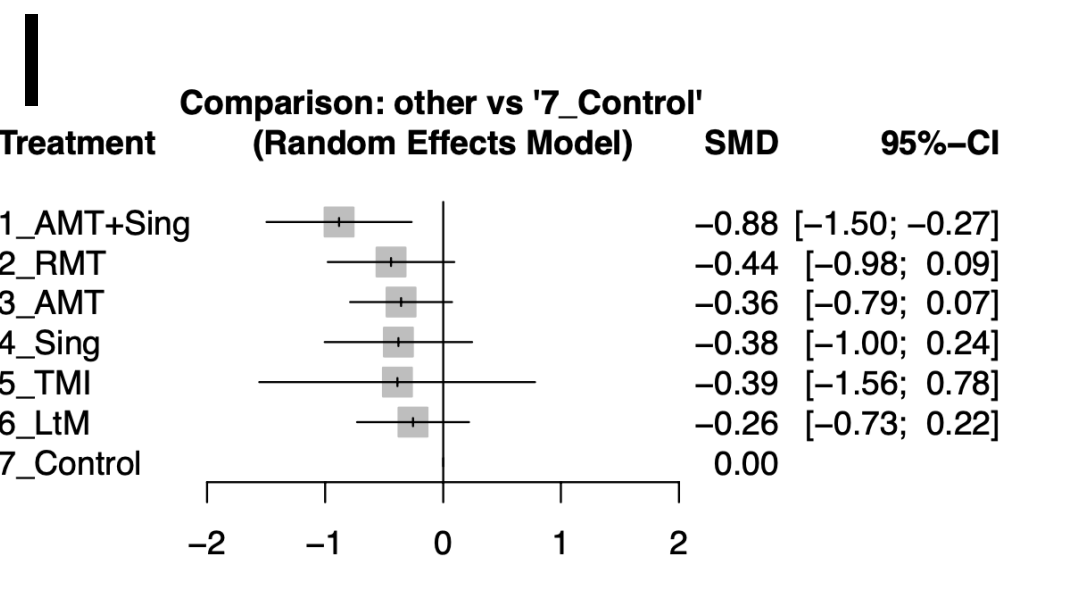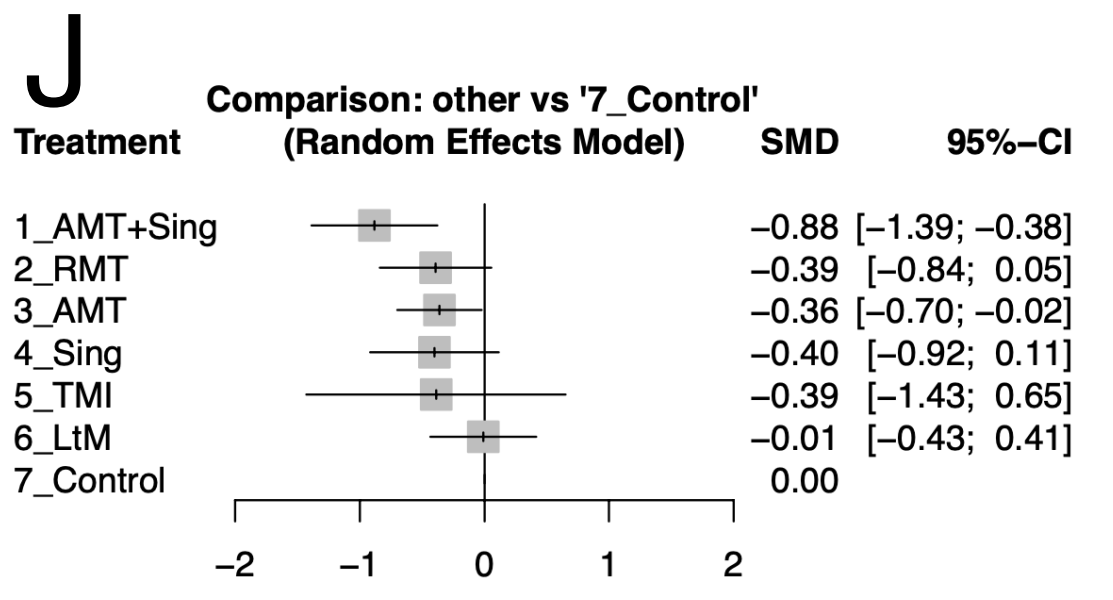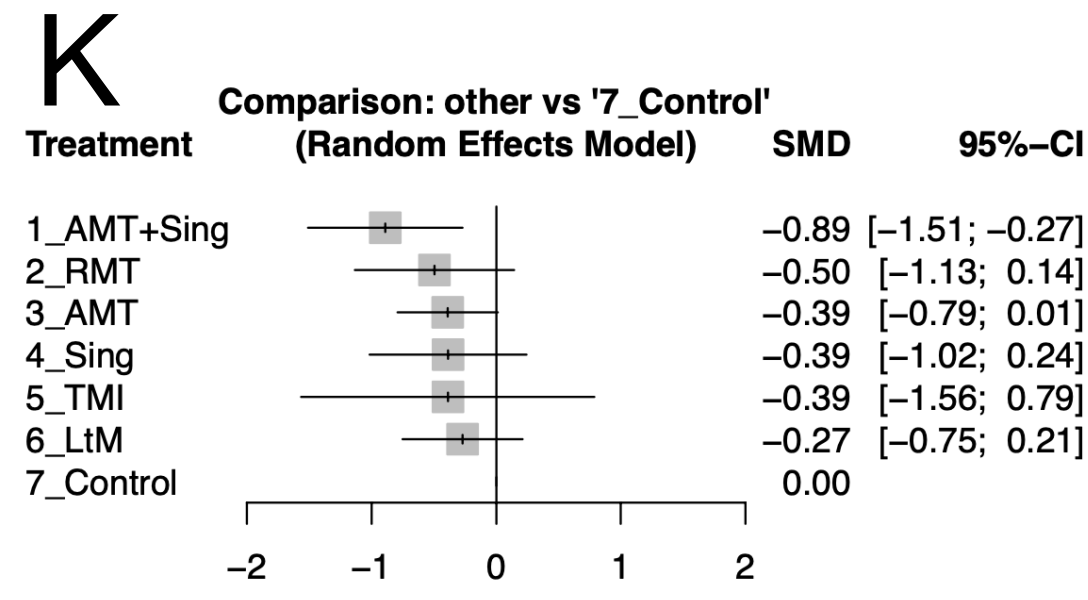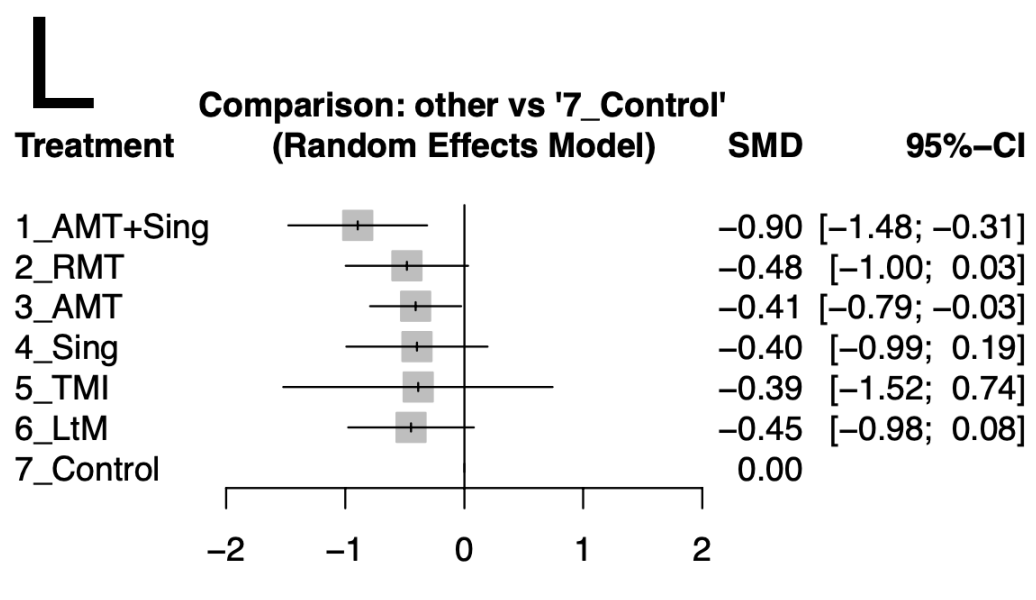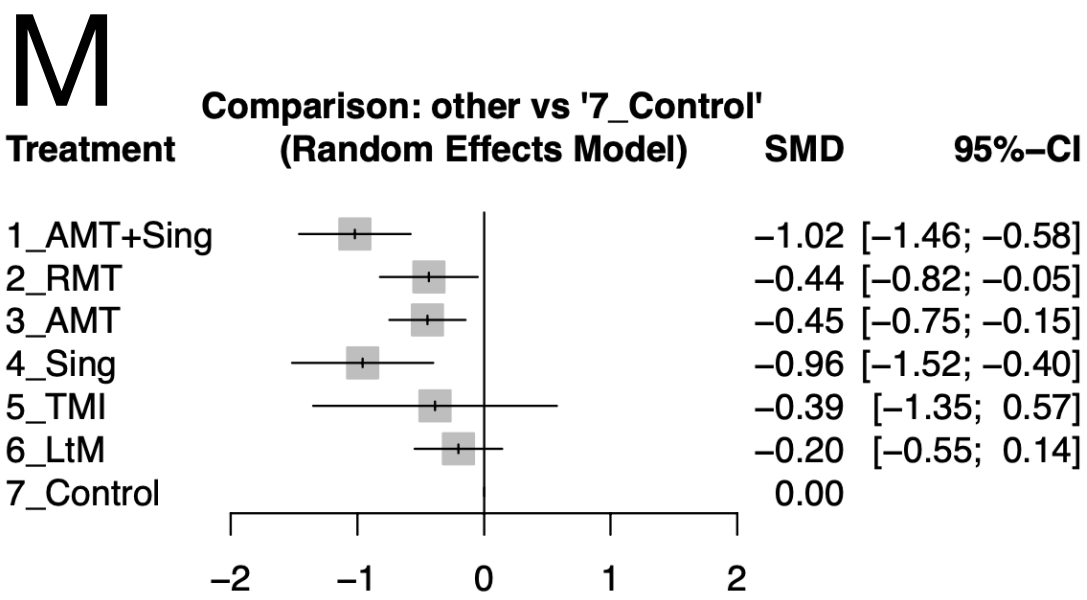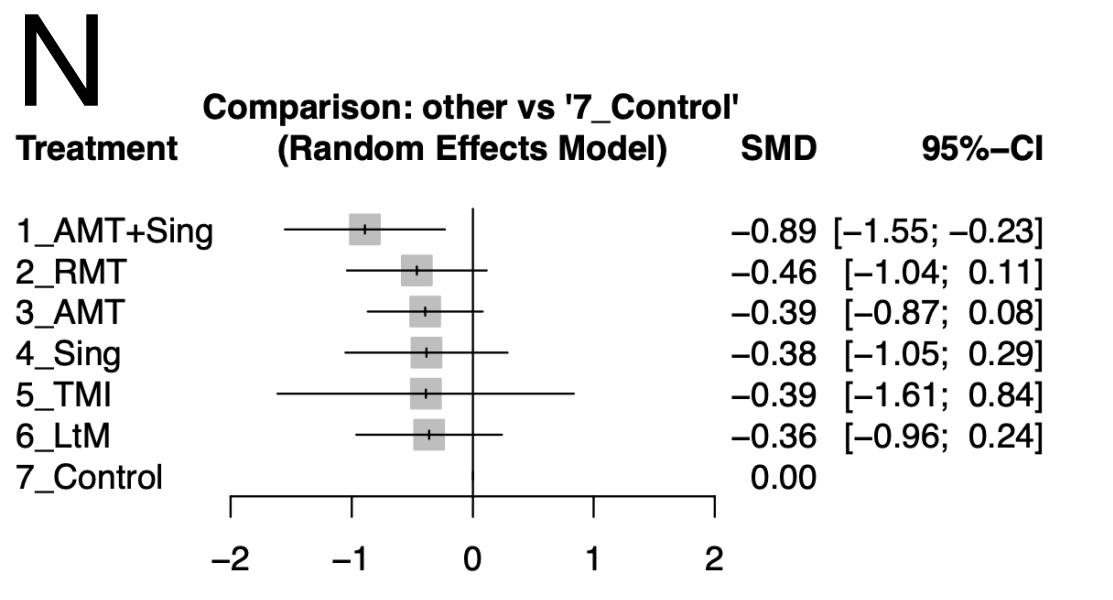

#### Studies Excluded One by One (Referenced Alphabetically)

- |                              |                            |
|------------------------------|----------------------------|
| A. Baker et al., 2022        | H. Giovagnoli et al., 2017 |
| B. Biasutti et al., 2021     | I. Giovagnoli et al., 2018 |
| C. Ceccato et al., 2012      | J. Guétin et al., 2009     |
| D. Cheung et al., 2018       | K. Liu et al., 2021        |
| E. Cheung et al., 2022       | L. Pérez-Ros et al., 2019  |
| F. Chu et al., 2013          | M. Pongan et al., 2017     |
| G. Delphin-Combe et al. 2013 | N. Raglio et al., 2015     |

**Fig-S4** displays forest plots for sensitivity analysis using the one-study removal method, where each of the 14 studies included was sequentially omitted according to their publication year (labeled a to n).

**Fig-S4**

Figure S5

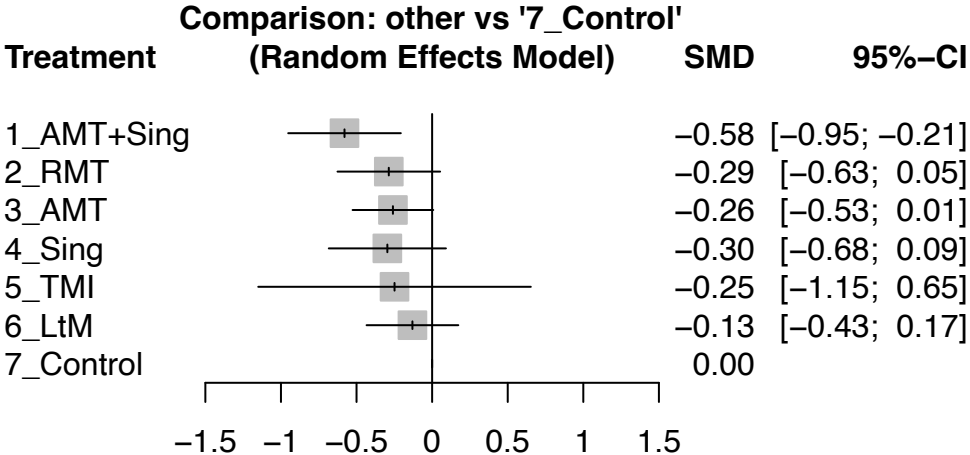

Fig. S5 - Forest plot displaying the improvement in depression symptoms in dementia patients after receiving music therapy interventions, presented as standardized mean differences (SMDs). The pre-post correlation coefficient used in the calculation of data was changed from 0.8 used in Figure 3 to 0.5 in this figure as a sensitivity analysis. The ranking and clinical interpretations remained unchanged compared to Figure 3. This suggests that the conclusions of our study remain unchanged despite different assumptions regarding the coefficient used for transformation.

Figure S6

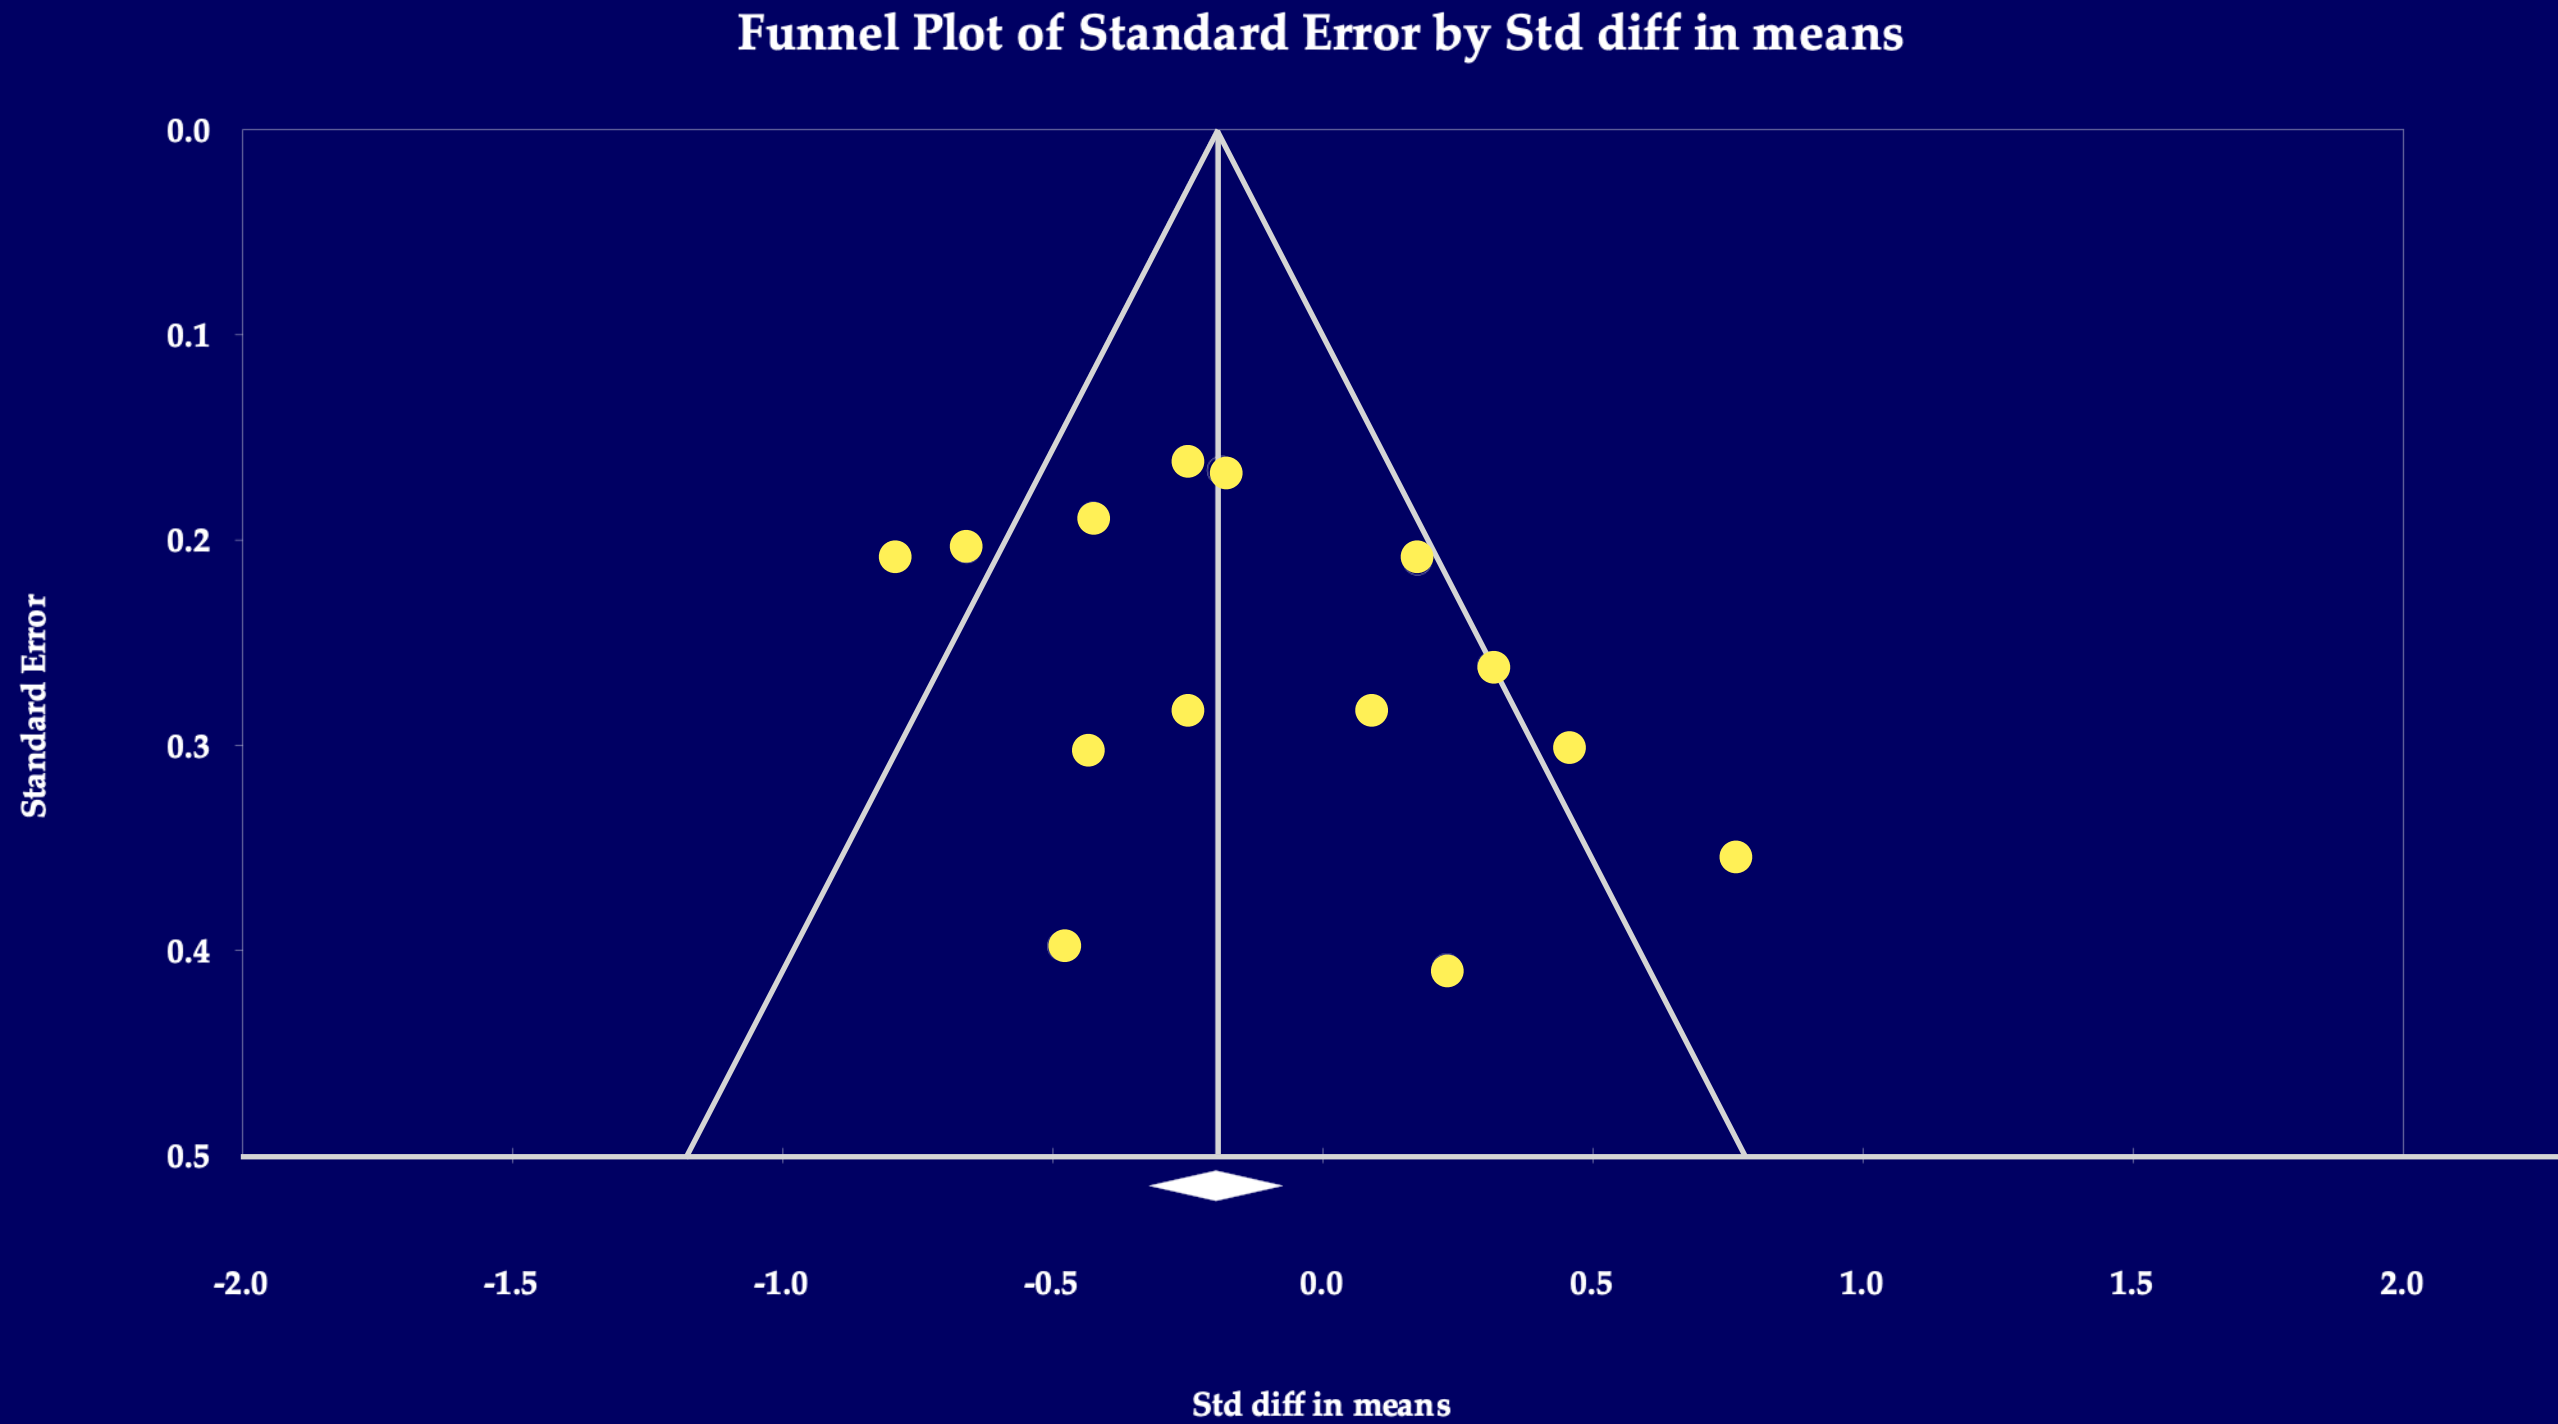

**FigS6.** Egger's test revealed no significant publication bias (intercept = 2.39, 95% CI (-0.94 to 5.72),  $t = 1.56$ ,  $df = 12$ ,  $p = 0.072$  [1-tailed],  $p = 0.144$  [2-tailed]), indicating that the results are reliable.
